# Supplementary material
Source: Springer Nature journal article supplement (https://www.springermedizin.de/resource/supplementary/12885_2011_2767_MOESM7_ESM.pdf/9461894)

**Normalized and Temp-Shifted Difference Plot**

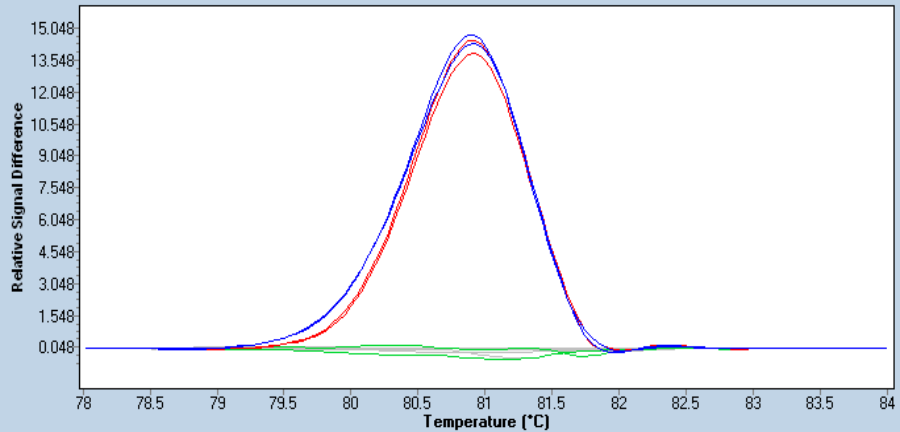

**Melting Peaks**

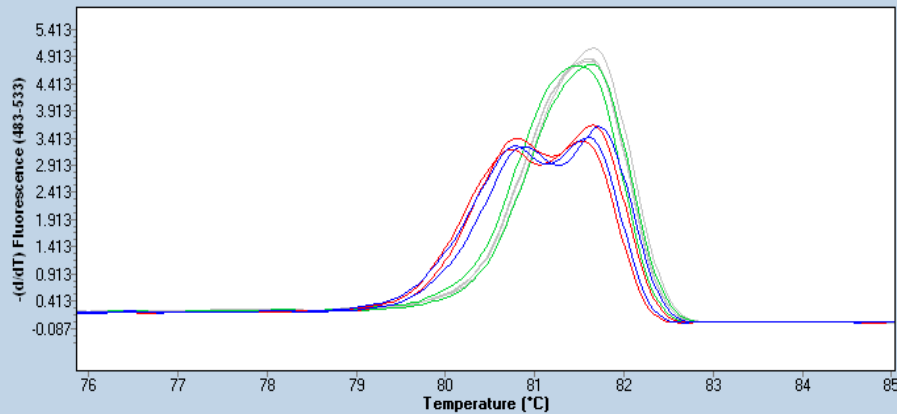

Supplement: MOESM7 [file 9461894]
